# Supplementary material
Source: bioRxiv or medRxiv preprint supplement (https://www.biorxiv.org/highwire/filestream/800/field_highwire_adjunct_files/0/003137-1.pdf)
Supplement: Supplementary file [file 003137-1.pdf]

Supporting information:

Distributional properties of the relative bias (RB) and the coefficient of deviation (COD) of the estimates of the biodiversity parameter  $\theta$ .

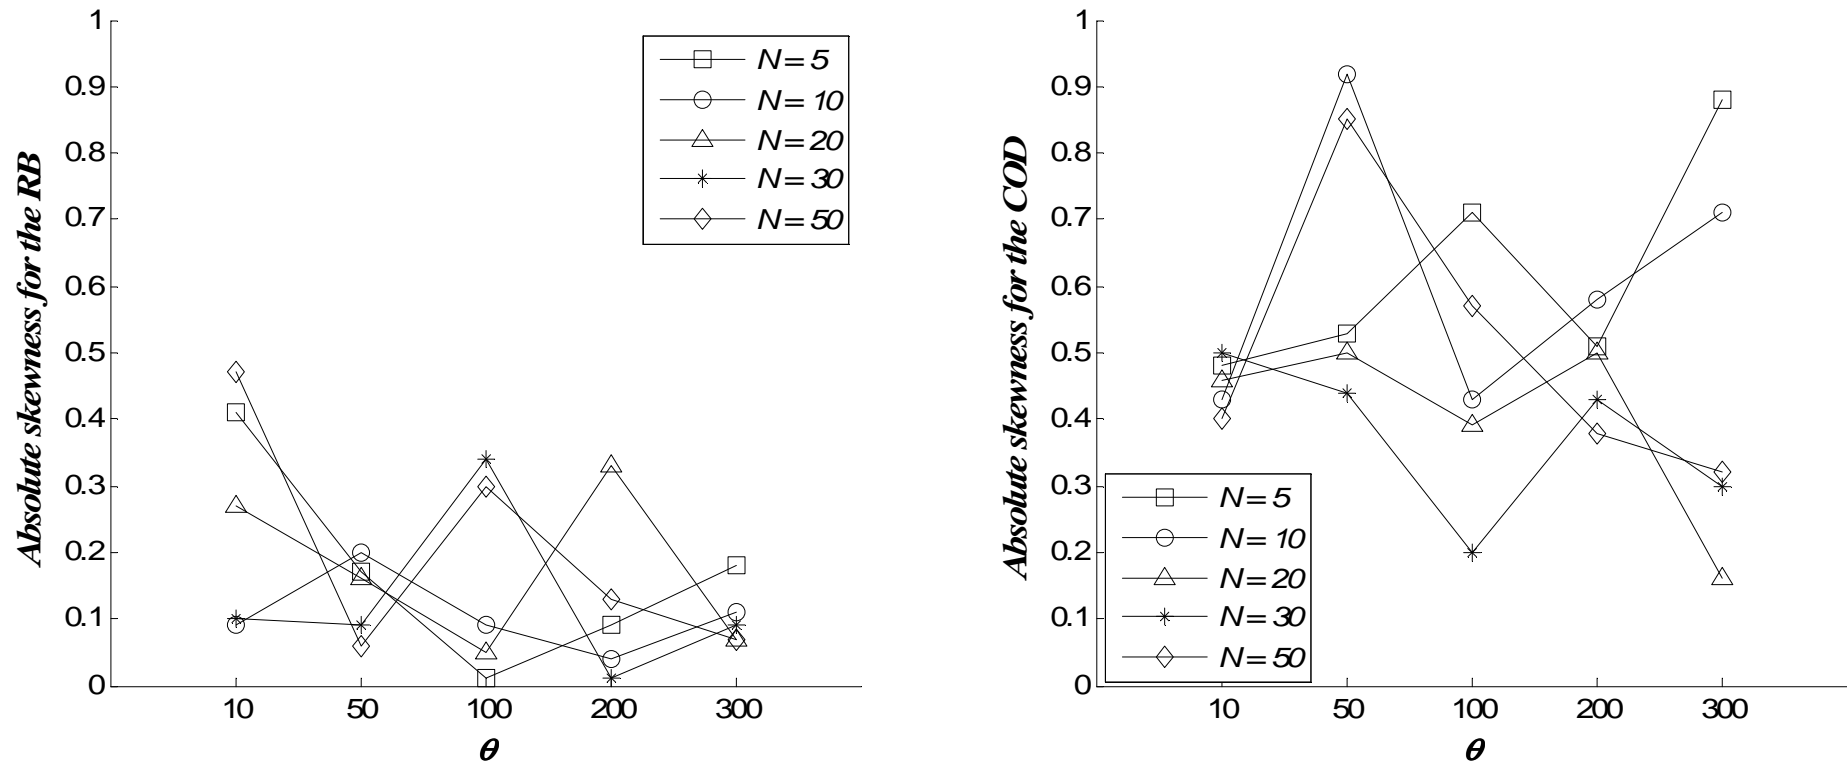

Figure S1 The absolute value of the skewness of the RB (*left*) and COD (*right*) histograms are plotted. The plots correspond to a total of 5 (values of  $N$ ) x 5 (values of  $\theta$ ) = 25 scenarios simulated using a coalescence approach where each  $(\theta, N)$  scenario gives rise to 200 values of  $\hat{\theta}$  and thus an equal number of RB and COD values. The histograms were considered only between the 5<sup>th</sup> and the 95<sup>th</sup> quantiles of the 200 values while computing their skewness.
